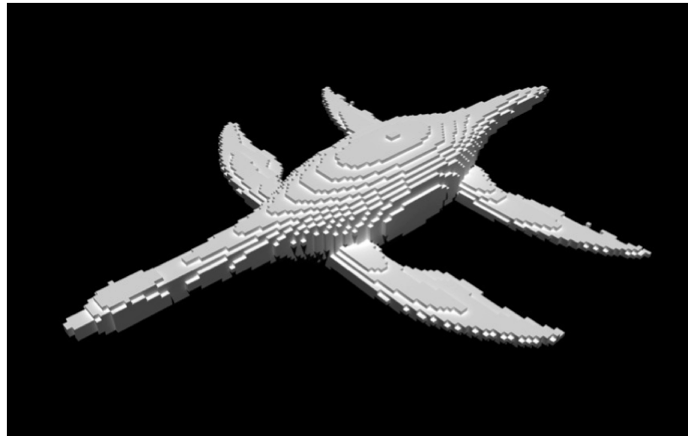

**Fig 8. Model voxelization.** The voxelized version of the plesiosaur mesh, using 3x3x3 sub-grid voxelization. The model is re-voxelized at each simulated time-step, which further minimizes the effects of voxelization.

doi:10.1371/journal.pcbi.1004605.g008

We calculate the swimming distance as the displacement of the plesiosaur's center of mass (COM) in one swimming cycle projected onto its initial heading direction. The deviation from straight swimming is decomposed into two components: Directional deviation is measured by the displacement of COM that is perpendicular to the initial heading direction. Orientation deviation is measured simply as the orientation change in one swimming cycle. Since the simulation starts with a static plesiosaur submerged in motionless water, we evaluate the objective function only after the first stroke cycle is completed, when the plesiosaur has reached a steady speed. Forelimb-only and all limb optimizations were initiated with the front limbs in the fully abducted position and the hindlimbs in the neutral position. Hindlimb-only optimizations were initiated with the hindlimbs in the fully abducted position and the forelimbs in the neutral position. This forced all of the gait samples to begin with a downstroke, so that no gait was penalized for a slow start that is mid-way through a stroke.

We used Covariance Matrix Adaptation (CMA) [34, 45] to search for the sample  $s$  that gives us the highest quality. CMA is a sample-based approach to optimization that uses a Gaussian distribution to guide its selection of motion samples to test. Each iteration of the CMA draws a new set of samples based on the current distribution, and evaluates the quality of these samples using  $q(s)$ . The mean and the covariance matrix of the Gaussian are then updated according to a subset of sample with higher quality. As more iterations are taken, the covariance matrix narrows down towards the best quality sample. In our case, the best sample is the swimming motion parameters that move the simulated plesiosaur the farthest in a straight line through the water.

To converge to the optimal motion, CMA requires many samples to be evaluated. Each sample evaluation requires a full simulation of the specified motion, and each such plesiosaur/fluid simulation requires roughly one hour of computation. We used 31 samples per iteration of CMA, and we found that a typical optimization run converged in about 70 iterations, after which the quality of the motion samples does not improve. This means that a full optimization requires more than two thousand swimming simulations. We made use of a compute cluster with 32 nodes, so that the computations for a single iteration were all calculated in parallel on separate nodes. (One of these computer nodes coordinates the simulations of the other 31 nodes.) Even with the compute cluster, performing CMA optimization for a single set of joint ranges requires three days to run.

Although CMA converges to high quality samples, there is no guarantee that it will find the best possible sample in our 26-dimensional search space. This explains why, for the wide joint

range, the best forelimb-only swimmer that was found is slightly faster than the all-limbs swimmer (Fig 5). To verify that this was due to small variations between optimization runs, we ran a total of three optimization runs for each of these two cases for the wide joint range. The three optimization runs for all-limbs gave speeds of 0.745, 0.75, and 0.785 (m/s), and the three runs for forelimbs-only resulted in speeds of 0.745, 0.80, and 0.84. Note that these ranges overlap. Fig 5 reports the fastest speeds from each of these sets of three optimization runs.

## Supporting Information

**S1 Video. Efficient swimming motions.** Animation showing the most efficient swimming motions that were found in each of the three joint ranges (wide, medium, and narrow). For each joint range, animations are shown for both sets of limbs, for only forelimbs, and for only hindlimbs. White streamlines show the motion of the surrounding fluid. (MP4)

**S2 Video. Tip traces.** Animation showing the motion of the tips of the limbs for the most efficient swimming motions in each of the three joint ranges. The camera view is locked to move with the plesiosaur model to more clearly show these tip traces. For each swimming motion, both a lateral view and a posterolateral view are shown. (MP4)

## Acknowledgments

We thank Neil Bright and Ron Hutchins of the Office of Information Technology at Georgia Tech for the use of compute time on the FoRCE Cluster.

## Author Contributions

Conceived and designed the experiments: SL ASS YG JT CKL GT. Performed the experiments: SL JT. Analyzed the data: SL ASS YG JT CKL GT. Wrote the paper: SL ASS JT CKL GT. Plesiosaur body layout and joint ranges: ASS. Created digital models: YG. Wrote simulation software: JT SL.

## References

1. Ketchum H. F. & Benson R. B. J. Global interrelationships of Plesiosauria (Reptilia, Sauropterygia) and the pivotal role of taxon-sampling in determining the outcome of phylogenetic analyses. *Biological Reviews*, 85, 361–392 (2010). doi: [10.1111/j.1469-185X.2009.00107.x](https://doi.org/10.1111/j.1469-185X.2009.00107.x) PMID: [20002391](https://pubmed.ncbi.nlm.nih.gov/20002391/)
2. O’Keefe F. R. The evolution of plesiosaur and pliosaur morphotypes in the Plesiosauria (Reptilia: Sauropterygia). *Palaeobiology*, 28(1), 101–112 (2002).
3. Carpenter K., Sanders F., Reed B., Reed J., & Larson P.. Plesiosaur swimming as interpreted from skeletal analysis and experimental results. *Transactions of the Kansas Academy of Science*, 113(1/2), 1–34 (2010).
4. Watson D. M. S. The Elasmosaurid Shoulder-girdle and Fore-limb. *Proceedings of the Zoological Society of London* 94(3), 885–917 (1924).
5. Robinson J. A. The locomotion of plesiosaurs. *Neues Jahrbuch für Geologie und Paläontologie, Abhandlungen*, 149, 286–332 (1975).
6. Godfrey S. J. Plesiosaur subaqueous locomotion: a reappraisal. *Neues Jahrbuch für Geologie und Paläontologie, Monatshefte*, 11, 661–672 (1984).
7. Riess J., & Frey E. The evolution of underwater flight and the locomotion of plesiosaurs. pp 131–144 in, Raynor J.M.V, and Wootton E.J. (eds.) *Biomechanics in Evolution*. Cambridge: Cambridge University Press (1991).
8. Lingham-Soliar T. Plesiosaur locomotion: is the four-wing problem real or merely an atheoretical exercise. *Neues Jahrbuch für Geologie und Paläontologie, Abhandlungen*, 217(1), 45–87 (2000).

9. Frey E., & Riess J. Considerations concerning plesiosaur locomotion. *Neues Jahrbuch für Geologie und Paläontologie, Abhandlungen*, 164, 193–194 (1982).
10. Conybeare W. D. On the discovery of an almost perfect skeleton of the *Plesiosaurus*. *Transactions of the Geological Society of London, Second Series*, 1, 381–390 (1824).
11. Walker F. W. Swimming in Sea Turtles of the Family Cheloniidae. *Copeia*, 1971(2), 229–233 (1971).
12. Clark B. D., & Bemis W. Kinematics of swimming of penguins at the Detroit Zoo. *Journal of Zoology*, 188, 411–428 (1979).
13. English A. W. Limb movements and locomotor function in the California sea lion (*Zalophus californianus*). *Journal of Zoology*, 178(3), 341–364 (1976).
14. Araújo R., and Correia F. Soft-tissue anatomy of the pectoral girdle inferred from basal Eosauropterygia taxa and the extant phylogenetic bracket. *Palaeontologia Electronica* 18.1.8A: 1–32 (2015).
15. Halstead L. B. Plesiosaur locomotion. *Journal of the Geological Society*, 146(1), 37–40 (1989).
16. Tarlo L. B. The scapula of *Pliosaurus macromeris* Phillips. *Palaeontology*, 1(3), 193–199 (1957).
17. Long J. H. Jr, Schumacher J., Livingston N., & Kemp M. Four flippers or two? Tetrapodal swimming with an aquatic robot. *Bioinspiration & Biomimetics*, 1(1), 20–29 (2006).
18. Borazjani I., & Sotiropoulos F. On the role of form and kinematics on the hydrodynamics of self-propelled body/caudal fin swimming. *The Journal of experimental biology*, 213(1), 89–107 (2010). doi: [10.1242/jeb.030932](https://doi.org/10.1242/jeb.030932) PMID: [20008366](https://pubmed.ncbi.nlm.nih.gov/20008366/)
19. Kern S., & Koumoutsakos P. Simulations of optimized anguilliform swimming. *Journal of Experimental Biology*, 209(24), 4841 (2006).
20. Shirgaonkar A. A., Maclver M. A., & Patankar N. A. A new mathematical formulation and fast algorithm for fully resolved simulation of self-propulsion. *Journal of Computational Physics*, 228(7), 2366–2390 (2009).
21. Shirgaonkar A. A., Curet O. M., Patankar N. A., & Maclver M. A. The hydrodynamics of ribbon-fin propulsion during impulsive motion. *Journal of Experimental Biology*, 211(21), 3490–3503 (2008).
22. Liu H., & Kawachi K. A numerical study of undulatory swimming. *Journal of Computational Physics*, 155(2), 223–247 (1999).
23. Jiang H., Meneveau C., & Osborn T. R. The flow field around a freely swimming copepod in steady motion. Part II: Numerical simulation. *Journal of Plankton Research*, 24(3), 191–213 (2002).
24. Smith A. S., & Vincent P. A new genus of pliosaur (Reptilia: Sauropterygia) from the Lower Jurassic of Holzmaden, Germany. *Palaeontology*, 53(5), 1049–1063 (2010).
25. O’Keefe F. R., Street H. P., Wilhelm B. C., Richards C. D. & Zhu H. A new skeleton of the cryptoclidid plesiosaur *Tatenectes laramiensis* reveals a novel body shape among plesiosaurs. *Journal of Vertebrate Paleontology*, 31, 330–339 (2011).
26. Smith A. S. & Benson R. B. J. Osteology of *Rhomaleosaurus thorntoni* (Sauropterygia: Rhomaleosauridae) from the Lower Jurassic (Toarcian) of Northamptonshire, England. *Monograph of the Palaeontographical Society*, London: 1–40, pls 1–35. (Publ. No. 642, part of Vol. 168 for 2014).
27. Dames W. B. Die plesiosaurier der süddeutschen Liasformation. *Abhandlungen der Königlich Preussischen Akademie der Wissenschaften zu Berlin* 1895: 1–81 (1895).
28. von Huene F., Ein neuer Plesiosaurier aus dem oberen Lias Württembergs. *Jahreshefte des Vereins für Vaterländische Naturkunde in Württemberg*, 79, 1–21 (1923).
29. Smith A. S. Morphology of the caudal vertebrae in *Rhomaleosaurus zetlandicus* and a review of the evidence for a tail fin in Plesiosauria. *Paludicola*, 9(3), 144–158 (2013).
30. Henderson D. M. Floating point: a computational study of buoyancy, equilibrium, and gastroliths in plesiosaurs. *Lethaia*, 39, 227–244 (2006).
31. Tan J., Gu Y., Turk G., and Liu C. K. Articulated swimming creatures. *ACM Transactions on Graphics*, 30(4), 58:1–58:12 (2011).
32. Zammit M., Daniels C. B., & Kear B. P. Elasmosaur (Reptilia: Sauropterygia) neck flexibility: Implications for feeding strategies. *Comparative Biochemistry and Physiology Part A: Molecular & Integrative Physiology*, 150(2), 124–130 (2008).
33. Zhang Q., Wen W., Hu S., Benton M. J., Zhou C., Xie T., Lü T., Huang J., Choo B., Zhong-Qiang Chen Z-Q, Liu J., & Zhang Q. Nothosaur foraging tracks from the Middle Triassic of southwestern China. *Nature communications*, 5 (2014).
34. Hansen N. The CMA Evolution Strategy: A Comparing Review. In *Towards a new evolutionary computation. Advances on estimation of distribution algorithms*, Editors Lozano JA, Larranga P, Inza I and Bengoetxea E, editors. pages 75–102, Springer (2006).

35. Wampler K., and Popović Z. Optimal gait and form for animal locomotion. *ACM Transactions on Graphics*, 28(3), 1–8 (2009).
36. Motani R. Swimming speed estimation of extinct marine reptiles: energetic approach revisited. *Paleobiology*, 28(2), 251–262 (2002).
37. O’Keefe F. R. Ecomorphology of plesiosaur flipper geometry. *Journal of Evolutionary Biology*, 14, 987–991 (2001).
38. Harlow F. H., Welch J. E. Numerical calculation of time-dependent viscous incompressible flow of fluid with a free surface. *Physics of Fluids*, 8, 2182–2189 (1965).
39. Kim B., Liu Y., Llamas I., & Rossignac J. Flowfixer: Using BFEC for fluid simulation. *Proceedings of the First Eurographics conference on Natural Phenomena*, 51–56 (2005).
40. Tan J., Liu K., & Turk G. Stable proportional-derivative controllers. *IEEE Computer Graphics and Applications*, 31(4), 34–44 (2011). doi: [10.1109/MCG.2011.30](https://doi.org/10.1109/MCG.2011.30) PMID: [24808157](https://pubmed.ncbi.nlm.nih.gov/24808157/)
41. Batty C., Bertails F., & Bridson R. A fast variational framework for accurate solid-fluid coupling. *ACM Transactions on Graphics*, 26(3) (2007).
42. MacDonald D. J. and Booth K. S. Heuristics for Ray Tracing Using Space Subdivision. *Visual Computer*, 6(3), 153–166 (1990).
43. Bridson R., Muller-Fischer M. Fluid simulation. *ACM SIGGRAPH Course Notes* (2007).
44. Munson B. R., Rothmayer A. P., Okiishi T. H., Huebsch W. W., *Fundamental of fluid mechanics*, 7th Edition (2012).
45. Hansen N. The CMA Evolution Strategy: A Tutorial (2009).
